# Supplementary material for: Cockayne Syndrome: The many challenges and approaches to understand a multifaceted disease
Source: PubMed Central journal article supplement (PMC7250278; doi:10.1590/1678-4685-gmb-2019-0085), 2020-05-20
Supplement: 1415-4757-GMB-43-1-s1-e20190085-suppl1.pdf [file 1415-4757-GMB-43-1-s1-e20190085-suppl1.pdf]

## Supplementary Material to “Cockayne Syndrome: The many challenges and approaches to understand a multifaceted disease”

**Table S1** - Homozygous and heterozygous *ERCC6* (*CSB*) mutations and their effects on patients phenotype.

| <i>CSB</i> - Homozygous |                    |         |                                |
|-------------------------|--------------------|---------|--------------------------------|
| Mutation                | Patient code       | CS type | Reference                      |
| p.Arg735*               | CS17LO<br>CS128ST  | CS I    | (Calmels <i>et al.</i> , 2018) |
| p.Arg652*               | CS10X              | ?       | (Calmels <i>et al.</i> , 2018) |
| p.(Gln854*)             | CS144ST            | CS II   | (Calmels <i>et al.</i> , 2018) |
| p.(Asp1355Valfs*32)     | CS071ST<br>CS222ST | CS I    | (Calmels <i>et al.</i> , 2018) |
|                         | CS204ST<br>CS221ST | CS III  | (Calmels <i>et al.</i> , 2018) |
| p.Leu72Cysfs*12         | CS18BR             | CS I    | (Calmels <i>et al.</i> , 2018) |
| p.(Glu214*)             | CS010ST            | CS I    | (Calmels <i>et al.</i> , 2018) |
| p.Ser357*               | CS13PV             | CS I    | (Calmels <i>et al.</i> , 2018) |
| p.(Thr377Glnfs*28)      | CS201ST            | CS II   | (Calmels <i>et al.</i> , 2018) |
| p.Lys478Thrfs*9         | CS19PV             | CS II   | (Calmels <i>et al.</i> , 2018) |
| p.Trp517*               | CS4TAN<br>CS8TAN   | CS II   | (Calmels <i>et al.</i> , 2018) |
| p.(Glu564*)             | CS107ST            | CS II   | (Calmels <i>et al.</i> , 2018) |
| p.(Asp646Asn)           | CS253ST            | CS II   | (Calmels <i>et al.</i> , 2018) |
| p.Arg652*               | CS13MA             | CS II   | (Calmels <i>et al.</i> , 2018) |
| p.(Thr659Cysfs*24)      | CS232ST            | CS II   | (Calmels <i>et al.</i> , 2018) |
| p.Phe665Tyrf*18         | CS1PL              | CS III  | (Calmels <i>et al.</i> , 2018) |

|                            |                                                      |        |                                     |
|----------------------------|------------------------------------------------------|--------|-------------------------------------|
| p.Gly715*                  | CS23PV                                               | CS I   | (Calmels <i>et al.</i> , 2018)      |
| p.Phe665_Gln723del         | CS11MA                                               | CS II  | (Calmels <i>et al.</i> , 2018)      |
| p.Asn760Lysfs*2            | CS8PV                                                | CS II  | (Calmels <i>et al.</i> , 2018)      |
| p.Met867Thrfs*14           | CS31PV                                               | CS II  | (Calmels <i>et al.</i> , 2018)      |
| <i>p.Leu875Pro</i>         | CS20PV                                               | CS II  | (Calmels <i>et al.</i> , 2018)      |
| p.Ala944Thrfs*10           | CS11LO                                               | CS II  | (Calmels <i>et al.</i> , 2018)      |
| p.Gln976Trpfs*70           | CS23BR                                               | CS II  | (Calmels <i>et al.</i> , 2018)      |
| p.(Thr1018Asnfs*32)        | CS210ST                                              | CS II  | (Calmels <i>et al.</i> , 2018)      |
| p.[Gln156*; Ser142Asnfs*4] | CS14LO                                               | CS I   | (Calmels <i>et al.</i> , 2018)      |
| p.[Arg176*;Ser142Asnfs*4]  | CS27PV                                               | CS I   | (Calmels <i>et al.</i> , 2018)      |
| p.(Ser429Lysfs*7)          | CS10LO                                               | CS I   | (Calmels <i>et al.</i> , 2018)      |
| p.Val161Serfs*5            | CS1BR                                                | ?      | (Calmels <i>et al.</i> , 2018)      |
| p.(Tyr1179Leufs*22)        | CS241ST                                              | ?      | (Calmels <i>et al.</i> , 2018)      |
| p.[Gln156*; Ser142Asnfs*4] | CS3SH                                                | ?      | (Calmels <i>et al.</i> , 2018)      |
| p.Arg670Trp                | ?                                                    | CS II  | (Chebly <i>et al.</i> , 2018)       |
| p.Arg453*                  | CS1PV<br>CS3PV                                       | CS II  | (Colella <i>et al.</i> , 1999)      |
| p.Arg735*                  | GM10905<br>GM10903                                   | DSC    | (Colella <i>et al.</i> , 2000)      |
| p.Lys345Asnfs*24           | CSB1NH                                               | CS II  | (Falik-Zaccai <i>et al.</i> , 2008) |
| p.Arg77Ilefs*6             | KPSX6                                                | CS III | (Hashimoto <i>et al.</i> , 2008)    |
| p.Arg77*                   | UVS1KO                                               | UVSS   | (Horibata <i>et al.</i> , 2004)     |
| p.Arg1288*                 | XVI-1<br>XVI-2<br>XIII-6<br>XIII-7<br>XIV-2<br>XIV-6 | COFS   | (Jaakkola <i>et al.</i> , 2010)     |

|                                   |                     |                |                                |
|-----------------------------------|---------------------|----------------|--------------------------------|
| p.Lys971Tryfs*14                  | ?                   | CS II          | (Kou <i>et al.</i> , 2018)     |
| p.Arg683*                         | CS789VI             | COFS           | (Laugel <i>et al.</i> , 2008)  |
| p.Val763_Gln794del                | CS514VI<br>CS385VI  | CS II          | (Laugel <i>et al.</i> , 2009)  |
| p.Arg652*                         | 08TR4               | CS II          | (Laugel <i>et al.</i> , 2009)  |
| p.Arg1288*                        | CS817VI             | CII            | (Laugel <i>et al.</i> , 2009)  |
| p.Arg1087*                        | CS6BI<br>CS8BI      | CS II          | (Laugel <i>et al.</i> , 2009)  |
| p.Gln854*                         | CS9MA               | CS II          | (Laugel <i>et al.</i> , 2009)  |
| p.Glu218Glyfs*4                   | AENT4               | CS I           | (Laugel <i>et al.</i> , 2009)  |
| p.Asp1355Valfs*32                 | CS1SACT             | CS I           | (Laugel <i>et al.</i> , 2009)  |
| p.Glu182Asnfs*4                   | CS799VI             | CS III         | (Laugel <i>et al.</i> , 2009)  |
| p.Gly715*                         | 08STR1              | CS II          | (Laugel <i>et al.</i> , 2009)  |
| p.[Arg176*;Gly399Asp; Ser1321Cys] | ?                   | CS III         | (Luo <i>et al.</i> , 2014)     |
| p.Trp517*                         | CS2TAN              | CS I           | (Mallery <i>et al.</i> , 1998) |
| p.Arg735*                         | CS1TAN              | CS I           | (Mallery <i>et al.</i> , 1998) |
| p.Trp851Arg                       | CS3TAN              | CS I           | (Mallery <i>et al.</i> , 1998) |
| p.Val957Gly                       | CS1IAF              | CS I           | (Mallery <i>et al.</i> , 1998) |
| p.Lys1239Glufs*2                  | ?                   | COFS           | (Meira <i>et al.</i> , 2000)   |
| p.Arg637Serfs*34                  | ?                   | CS III         | (Swartz <i>et al.</i> , 2015)  |
| p.Pro934Thr                       | ?                   | CS I           | (Wilson <i>et al.</i> , 2016)  |
| p.Trp936Cys                       | ?                   | CS II          | (Wilson <i>et al.</i> , 2016)  |
| p.Gln463*                         | ?                   | CS I           | (Zhang <i>et al.</i> , 2011)   |
| <b>CSB - Heterozygous</b>         |                     |                |                                |
| <b>Mutation</b>                   | <b>Patient code</b> | <b>CS type</b> | <b>Reference</b>               |

|                                                                 |                  |         |                                |
|-----------------------------------------------------------------|------------------|---------|--------------------------------|
| p.Ser687Leu<br>p.Arg1288*                                       | CS278ST          | CS II   | (Calmels <i>et al.</i> , 2016) |
| p.[Gln156;Ser142Asnfs*4]<br>p.Leu471Glnfs*16                    | CS1SH            | CS I    | (Calmels <i>et al.</i> , 2018) |
| p.[Arg176*;Ser142Asnfs*4]<br>p.Arg652*                          | CS1SO            | CS I    | (Calmels <i>et al.</i> , 2018) |
| p.[Arg176*;Ser142Asnfs*4]<br>p.Trp589del                        | CS1GO            | CS I    | (Calmels <i>et al.</i> , 2018) |
| p.Ser142Asnfs*4<br>p.Arg735*                                    | CS26PV           | CS III  | (Calmels <i>et al.</i> , 2018) |
| p.Arg453*<br>p.Val763Ilefs*7                                    | CS1WR            | CS II   | (Calmels <i>et al.</i> , 2018) |
| p.Arg467_Arg562del<br>p.Arg1318Glyfs*12                         | CS058ST          | CS I    | (Calmels <i>et al.</i> , 2018) |
| p.Tyr510_Arg562del<br>p.Glu608_Gln723del                        | CS18PV           | CS II   | (Calmels <i>et al.</i> , 2018) |
| p.Phe563Argfs*3<br>p.[Gln943*; Gln943Profs*8; Asp904_Gln943del] | CS17PV           | CS I/II | (Calmels <i>et al.</i> , 2018) |
| p.0<br>p.Phe665_Gln723del                                       | CS10MA<br>CS1LI  | CS II   | (Calmels <i>et al.</i> , 2018) |
|                                                                 | CS2BL            | ?       | (Calmels <i>et al.</i> , 2018) |
| p.Arg670Trp<br>p.Val763_Gln794del                               | CS18LO           | CS II   | (Calmels <i>et al.</i> , 2018) |
| p.Arg683*<br>p.Phe665_Gln723del                                 | CS12MA           | CS II   | (Calmels <i>et al.</i> , 2018) |
| p.Ser687Leu<br>p.Arg735*                                        | CS1GGO           | CS II   | (Calmels <i>et al.</i> , 2018) |
| p.Leu700Valfs*60<br>p.Arg735*                                   | CS22PV<br>CS28PV | CS I    | (Calmels <i>et al.</i> , 2018) |
| p.Phe665_Gln723del<br>p.Arg1221*                                | CS8MA            | CS II   | (Calmels <i>et al.</i> , 2018) |
| p.Phe665_Gln723del<br>p.Arg1087*                                | CS19LO           | CS II   | (Calmels <i>et al.</i> , 2018) |

|                                        |         |       |                                |
|----------------------------------------|---------|-------|--------------------------------|
| p.Arg735*<br>p.Lys1203fs               | CS2GR   | CS I  | (Calmels <i>et al.</i> , 2018) |
| p.Trp851Arg<br>p.Arg1318Glyfs*12       | CS21PV  | CS I  | (Calmels <i>et al.</i> , 2018) |
| p.0<br>p.Arg612*                       | CS195ST | CS II | (Calmels <i>et al.</i> , 2018) |
| p.[Gln156*;Ser142Asnfs*4]<br>p.Arg947* | CS5MA   | ?     | (Calmels <i>et al.</i> , 2018) |
| p.[Gln156*;Ser142Asnfs*4]<br>p.Arg735* | CS2LE   | III?  | (Calmels <i>et al.</i> , 2018) |
| p.Phe563Argfs*3<br>p.Arg735*           | CS25PV  | ?     | (Calmels <i>et al.</i> , 2018) |
| p.Arg683*<br>p.Arg1288*                | CS32LO  | ?     | (Calmels <i>et al.</i> , 2018) |
| p.Phe665_Gln723del<br>p.Gln953Lys      | CS3BL   | ?     | (Calmels <i>et al.</i> , 2018) |
| p.Arg735*<br>p.0                       | CS14PV  | CS I  | (Calmels <i>et al.</i> , 2018) |
| p.Ala944Thrfs*10<br>p.Tyr1179Leufs*22  | CS1BEL  | ?     | (Calmels <i>et al.</i> , 2018) |
| p.Arg612*<br>p.Arg975Trp               | ?       | CS II | (He <i>et al.</i> , 2017)      |
| p.Arg857*<br>p.Arg1087*                | CS816VI | COFS  | (Laugel <i>et al.</i> , 2008)  |
| p.Leu871Pro<br>p.Lys1172*              | CS881VI | COFS  | (Laugel <i>et al.</i> , 2009)  |
| p.Leu987Pro<br>p.Met752_Gln762del      | CS797VI | COFS  | (Laugel <i>et al.</i> , 2009)  |
| p.Val724_Gln762del<br>p.Trp686Cys      | CS683VI | CS II | (Laugel <i>et al.</i> , 2009)  |
| p.Gln723*<br>p.Leu860del               | CS3LE   | CS II | (Laugel <i>et al.</i> , 2009)  |
| p.Gly715*<br>p.Arg857*                 | 08STR1  | CS II | (Laugel <i>et al.</i> , 2009)  |

|                                         |         |        |                                  |
|-----------------------------------------|---------|--------|----------------------------------|
| p.Val724_Gln762del<br>p.Ala944Thrfs*10  | CS1GL   | CS II  | (Laugel <i>et al.</i> , 2009)    |
| p.Met867Thrfs*14<br>p.Lys1198Argfs*4    | CS117VI | CS II  | (Laugel <i>et al.</i> , 2009)    |
| p.Gln956Argfs*7<br>p.Ser687Leu          | CS360VI | CS II  | (Laugel <i>et al.</i> , 2009)    |
| p.Val417Serfs*7<br>p.0                  | CS179VI | CS II  | (Laugel <i>et al.</i> , 2009)    |
| p.Gln156*<br>p.His1263Glnfs*67          | CS21BR  | CS I   | (Laugel <i>et al.</i> , 2009)    |
| p.Trp236*<br>p.Pro500Glnfs*43           | CS493VI | CS I   | (Laugel <i>et al.</i> , 2009)    |
| p.Arg68Profs*13<br>p.Asn680Asp          | CS784VI | CS I   | (Laugel <i>et al.</i> , 2009)    |
| p.Arg637Serfs*34<br>p.Asp749Glufs*4     | CS543VI | CS III | (Laugel <i>et al.</i> , 2009)    |
| p.Glu182Asnfs*4<br>p.Glu379*            | CS393VI | CS III | (Laugel <i>et al.</i> , 2009)    |
| p.Ser1240_Val1260delinsIle<br>p.Arg735* | CS823VI | CS III | (Laugel <i>et al.</i> , 2009)    |
| p.Lys1203fs<br>p.Met867Thrfs*14         | CS1ABR  | CS II  | (Mallery <i>et al.</i> , 1998)   |
| p.Tyr1179Ilefs*22<br>p.Phe665_Gln723del | CS2BE   | ?      | (Mallery <i>et al.</i> , 1998)   |
| p.Arg735*<br>p.Arg453*                  | 25627   | CS I   | (Mallery <i>et al.</i> , 1998)   |
| p.Gln184*<br>p.Arg670Trp                | CS4BR   | CS I   | (Mallery <i>et al.</i> , 1998)   |
| p.Arg670Trp<br>p.Pro1042Leu             | CS2BI   | CS I   | (Mallery <i>et al.</i> , 1998)   |
| p.Ser142Asnfs*4                         | ?       | ?      | (Shehata <i>et al.</i> , 2014)   |
| p.Lys337*<br>p.Tyr834Cysfs*25           | CS1AN   | CS I   | (Troelstra <i>et al.</i> , 1992) |

|                             |   |      |                           |
|-----------------------------|---|------|---------------------------|
| p.(Glu215*)<br>p.(Ser1259*) | ? | ?    | (Wu <i>et al.</i> , 2016) |
| p.Asp532Gly<br>p.Leu536Trp  | ? | CS I | (Yu <i>et al.</i> , 2014) |

- Question mark (?) is used to refer to missing informations and uncertainties.
- The mutations nomenclature was described following the HGVS recommendations (Dunnen *et al.*, 2006).
- \* is used to indicate a stop codon.

## References

Calmels N, Greff G, Obringer C, Kempf N, Gasnier C, Tarabeux J, Miguet M, Baujat G, Bessis D, Bretones P *et al.* (2016) Uncommon nucleotide excision repair phenotypes revealed by targeted high-throughput sequencing. *Orphanet J Rare Dis* 11:26.

Calmels N, Botta E, Jia N, Fawcett H, Nardo T, Nakazawa Y, Lanzafame M, Moriwaki S, Sugita K, Kubota M *et al.* (2018) Functional and clinical relevance of novel mutations in a large cohort of patients with Cockayne syndrome. *J Med Genet* 55:329-343.

Chebly A, Corbani S, Ghoch JA, Mehawej C, Megarbane A and Chouery E (2018) First molecular study in Lebanese patients with Cockayne syndrome and report of a novel mutation in ERCC8 gene. *BMC Med Genet* 19:6–12.

Colella S, Nardo T, Mallery D, Borrone C, Ricci R, Ruffa G, Lehmann AR and Stefanini M (1999) Alterations in the CSB gene in three Italian patients with the severe form of Cockayne syndrome (CS) but without clinical photosensitivity. *Hum Mol Genet* 8:935–941.

Colella S, Nardo T, Botta E, Lehmann AR and Stefanini M (2000) Identical mutations in the CSB gene associated with either Cockayne syndrome or the DeSanctis-Cacchione variant of Xeroderma pigmentosum. *Hum Mol Genet* 9:1171–1175.

Falik-Zaccai TC, Laskar M, Kfir N, Nasser W, Slor H and Khayat M (2008) Cockayne syndrome type II in a Druze isolate in Northern Israel in association with an insertion mutation in ERCC6. *Am J Med Genet* 146:1423–1429.

Hashimoto S, Suga T, Kudo E, Ihn H, Uchino M and Tateishi S (2008) Adult-onset neurological degeneration in a patient with Cockayne syndrome and a null mutation in the CSB Gene. *J Invest Dermatol* 128:1597–1599.

He C, Sun M, Wang G, Yang Y, Yao L and Wu Y (2017) Two novel mutations in ERCC6 cause Cockayne syndrome B in a Chinese family. *Mol Med Reports* 15:3957–3962.

Horibata K, Iwamoto Y, Kuraoka I, Jaspers NG, Kurimasa A, Oshimura M, Ichihashi M and Tanaka K (2004) Complete absence of Cockayne syndrome group B gene product gives rise to UV-sensitive syndrome but not Cockayne syndrome. *Proc Natl Acad Sci U S A* 101:15410–15415.

Jaakkola E, Mustonen A, Olsen P, Miettinen S, Savuoja T, Raams A, Jaspers NG, Shao H, Wu BL and Ignatius J (2010) ERCC6 founder mutation identified in Finnish patients with COFS syndrome. *Clin Genet* 78:541–547.

Kou Y, Shboul M, Wang Z, Shersheer Q, Lyu Z, Liu P, Zhao X and Tian J (2018) Novel frame shift mutation in ERCC6 leads to a severe form of Cockayne syndrome with postnatal growth failure and early death: A case report and brief literature review. *Medicine (Baltimore)* 97:e11636

Laugel V, Dalloz C, Tobias ES, Tolmie JL, Martin-Coignard D, Drouin-Garraud V, Valayannopoulos V, Sarasin A and Dollfus H (2008) Cerebro-oculo-facio-skeletal syndrome: Three additional cases with CSB mutations, new diagnostic criteria and an approach to investigation. *J Med Genet* 45:564–571.

Laugel V, Dalloz AC, Durand M, Sauvanaud F, Kristensen U, Vincent MC, Pasquier L, Odent S, Gener B, Tobias ES *et al.* (2009) Mutation update for the CSB/ERCC6 and CSA/ERCC8 genes involved in Cockayne syndrome. *Hum Mutat* 31:113–126.

Luo Y, Ling Y, Chen J, Xu X, Chen C, Leng F, Cheng J, Chen M and Lu Z (2014) A new mutation in the CSB gene in a Chinese patient with mild Cockayne syndrome. *Clin Case Reports* 2:33–36.

Mallery DL, Tanganelli B, Colella S, Steingrimsdottir H, van Gool AJ, Troelstra C, Stefanini M and Lehmann AR (1998) Molecular analysis of mutations in the CSB (ERCC6) gene in patients with Cockayne syndrome. *Am J Hum Genet* 62:77–85.

Meira LB, Graham JM, Greenberg CR, Busch DB, Doughty AT, Ziffer DW, Coleman DM, Savre-Train I and Friedberg EC (2000) Manitoba aboriginal kindred with original cerebro-oculo-facio-skeletal syndrome has a mutation in the Cockayne syndrome Group B (CSB) Gene. *Am J Hum Genet* 66:1221–1228.

Shehata L, Simeonov DR, Raams A, Wolfe L, Vanderver A, Tifft CJ, He M, Jaspers NGJ and Gahl WA (2014) ERCC6 dysfunction presenting as progressive neurological decline with brain hypomyelination. *Am J Hum Genet* 164:2892–2900.

Swartz JM, Akinci A, Andrew S, Sigirci A, Hirschhown JN, Rosenfeld RG, Dauber A and Hwa V (2015) A novel ERCC6 splicing variant associated with a mild Cockayne syndrome phenotype. *Horm Res Paediatr* 27:320–331.



Troelstra C, van Gool A, de Wit J, Vermeulen W, Bootsma D and Hoeijmakers JHJ (1992) ERCC6, a member of a subfamily of putative helicases, is involved in Cockayne's syndrome and preferential repair of active genes. *Cell* 71:939–953.

Wilson BT, Lochan A, Stark Z and Sutton RE (2016) Novel missense mutations in a conserved loop between ERCC6 (CSB) helicase motifs V and VI : Insights into Cockayne syndrome. *Am J Med Genet Part A* 170:773–776.

Wu Y, Zheng Y, Yan X, Huang Y, Jiang Y and Li H (2016) Ocular findings in a patient with Cockayne syndrome with two mutations in the ERCC6 gene. *Ophtalmic Genet* 38:175–177.

Yu S, Chen L, Ye L, Fei L, Tang W and Tian Y (2014) Identification of two missense mutations of ERCC6 in three chinese sisters with Cockayne syndrome by Whole Exome Sequencing. *PloS One* 9:1–11.

Zhang H, Gao J, Ye J, Gong Z and Gu X (2011) Maternal origin of a de novo microdeletion spanning the ERCC6 gene in a classic form of the Cockayne syndrome. *Eur J Med Genet* 54:e389–e393.
